# Supplementary material for: An intercomparison of tropical cyclone best-track products for the Southwest Pacific
Source: Copernicus journal article supplement (doi:10.5194/nhess-2016-39), 2016-02-19
Supplement: Supplementary file 1 [file nhess-2016-39-supplement.pdf]

## Supplementary Figures

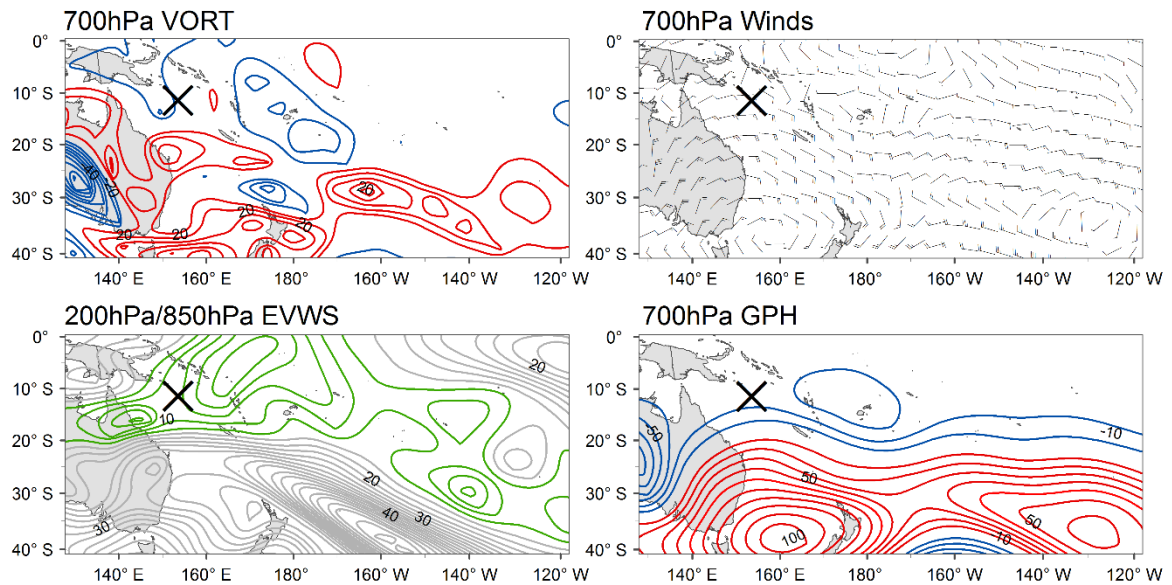

Figure S1. Validation of Environmental conditions for TC Event #1 (26/02/1949). Anomalies of 700hPa vorticity (VORT) ( $5 \text{ sec}^{-1} 10^{-6}$  contours) – blue – negative; red – positive; zero contour omitted; 700-hPa U- and V- winds (5-kt contour barbs); Absolute 200hPa/850hPa Environmental Vertical Wind Shear (EVWS) ( $2 \text{ m s}^{-1}$  contours) – green – wind shear  $\leq 10 \text{ m s}^{-1}$ ; grey – wind shear  $> 10 \text{ m s}^{-1}$ ; Anomalies of 700-hPa Geopotential Height (10 gpm contours) – blue – negative; red – positive; zero contour omitted. Data from 20<sup>th</sup> Century Reanalysis (Compo et al., 2011). Anomaly values calculated 1981-2010 climate normal. Black cross indicates point of cyclogenesis.

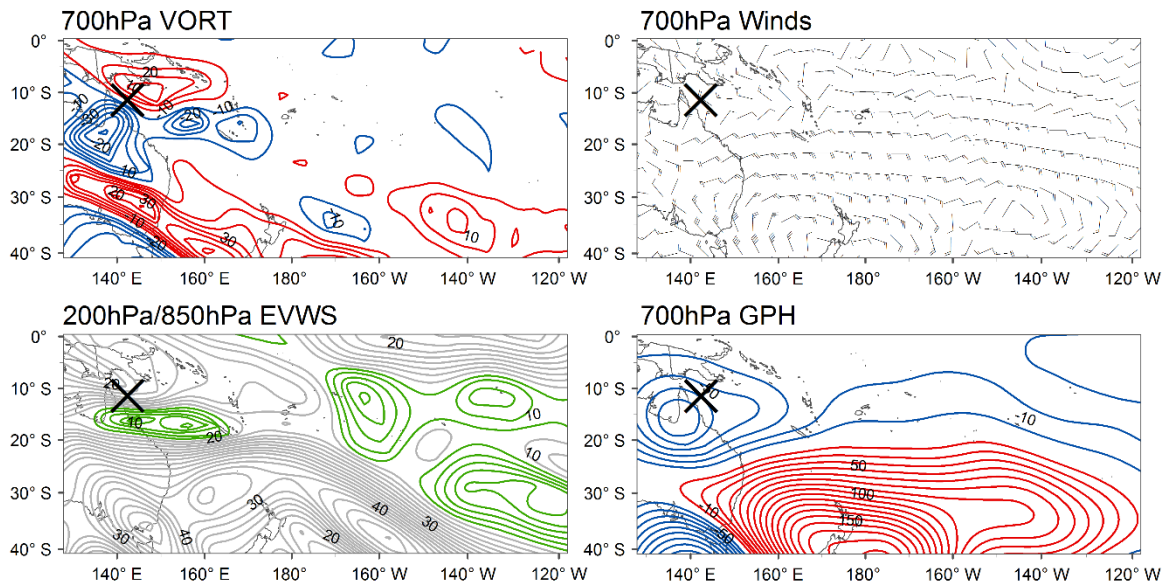

Figure S2. As in Figure S1 but for TC Event #2 (05/03/1950)

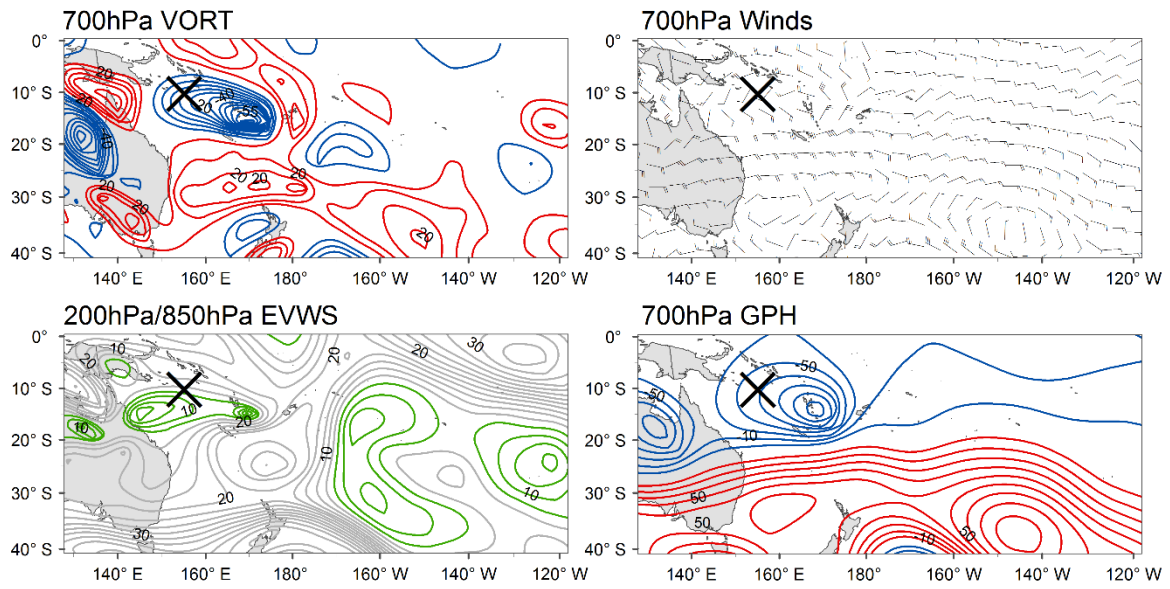

Figure S3. As in Figure S1 but for TC Event #3 (01/03/1955)

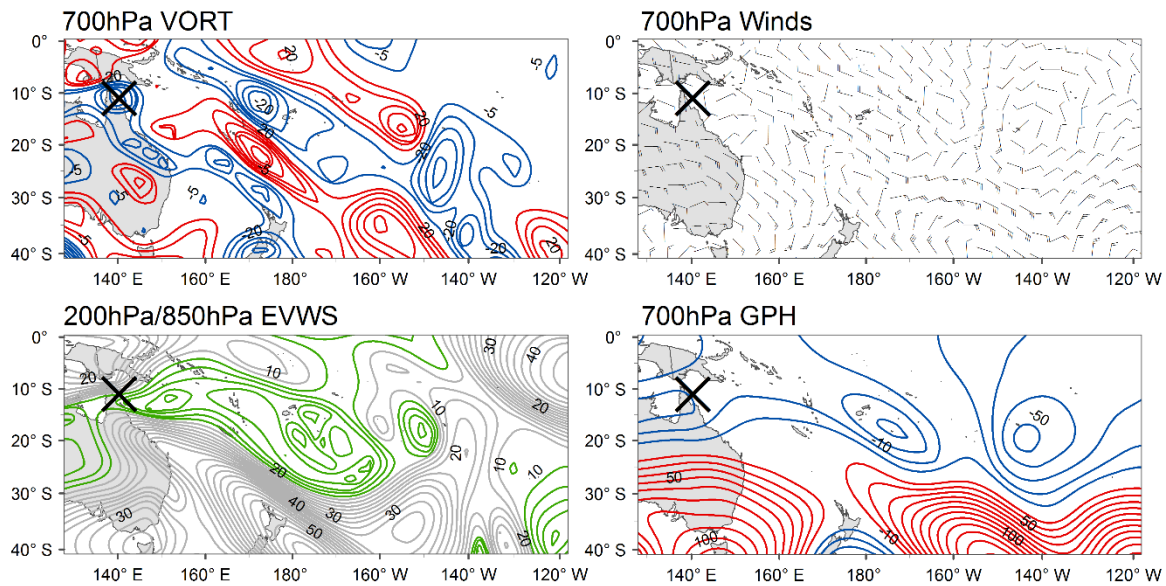

Figure S4. As in Figure S1 but for TC Event #4 (28/01/1986)

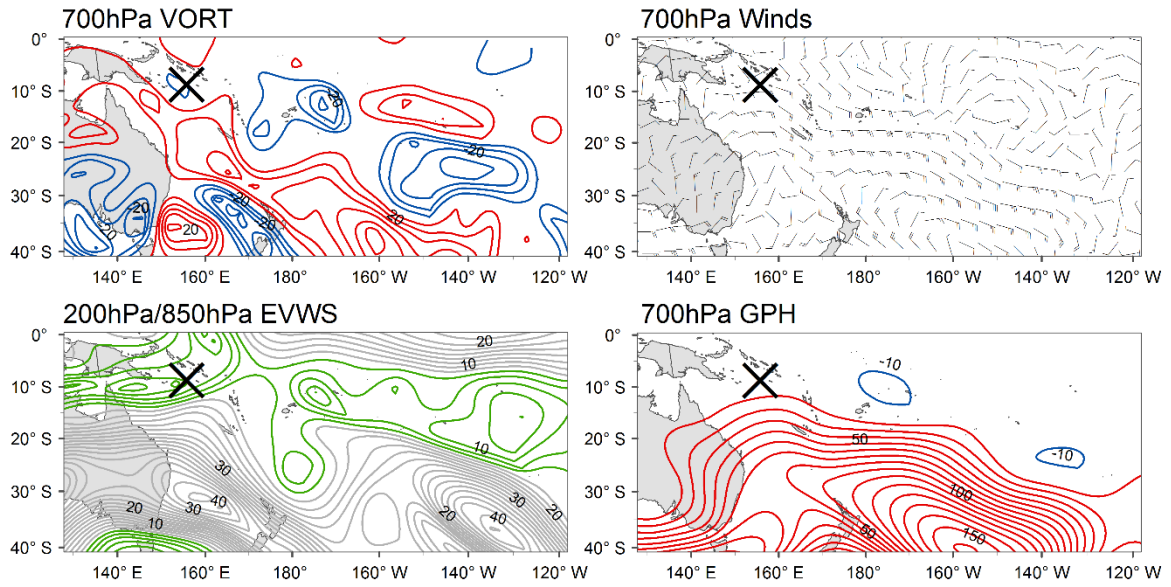

Figure S5. As in Figure S1 but for TC Event #5 (29/03/1989)
