# Supplementary material for: An intercomparison of tropical cyclone best-track products for the Southwest Pacific
Source: Copernicus journal article supplement (doi:10.5194/nhess-2016-39), 2016-02-19
Supplement: Supplementary file [file nhess-2016-39-AC2-supplement.pdf]

Dear Anonymous Referee #2,

We would like to thank you for your thoughtful and considered comments, which will ultimately improve our paper. We have addressed each of your comments (*in blue*) below.

#### Comments

1. This paper does a comprehensive comparison of various tropical cyclone characteristics for three different dataset available for the southwest Pacific, and comes to a conclusion that SPEArTC dataset is most appropriate. Even though results of this work was obvious from several previous studies, I do commend the authors for going a step ahead in examining in detail various characteristics of tropical cyclones and formally evaluating differences in various databases. I have no major concern regarding the methodology and results presented. However, another careful edit is recommended to correct minor errors in the paper, mainly grammatical.

Response: Another careful edit of the manuscript will be completed before resubmission. Comments from anonymous referee #1, highlighted grammatical errors and typos that will be addressed in the revised manuscript.
